# Supplementary material
Source: publisher site journal article supplement (https://www.dovepress.com/article/410047)
Supplement: Supplementary file 1 [file get_supplementary_file.php]

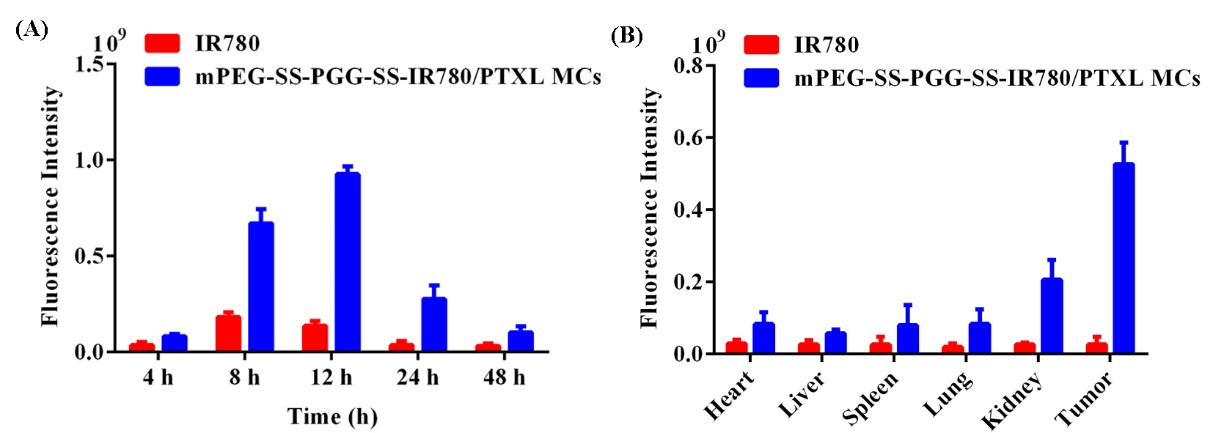


**Figure S1** (A) The fluorescence intensity quantification at tumor sites (n =3). (B) Quantification of fluorescence intensity in major organs and tumor tissues (n =3).
